# Supplementary material for: Insignificant effects of elevated CO 2 on bacterioplankton community in a eutrophic coastal mesocosm experiment
Source: Copernicus journal article supplement (doi:10.5194/bg-2017-10), 2017-01-30
Supplement: Supplementary file 1 [file bg-2017-10-supplement.pdf]

---

1 **Figure legend**

2 **Supplementary Fig. 1** Bacteria community structure of the inoculated phytoplankton (coccolithophore:  
3 *E. huxleyi*; diatom: *P. tricornutum* and *T. weissflogii*) culture at phylum (a), class (b), order(c), family  
4 (d), genus (d), species (d) level.

5

6 **Supplementary Fig. 2** The phylogenetic tree of OTUs from all samples.

7

8 **Supplementary Fig. 3** Composition of the top 10 taxa at the (a) class, (b) order, (c) family or (d) genus  
9 level for all samples.

10

11 **Supplementary Fig. 4** Rarefaction curves of samples from HC-2, HC-4, HC-7, LC-1, LC-6 and LC-8  
12 collected at various time points using different estimator methods including Observed species (a),  
13 Shannon index (b), Chao index (c), Simpson index (d).

14

15 **Supplementary Fig. 5** Bacterioplankton community diversity variation of HC-2, HC-4, HC-7, LC-1,  
16 LC-6 and LC-8 over time using different estimator methods including Observed species (a), Shannon  
17 index (b), Chao index (c), Simpson index (d).

18

19 **Supplementary Fig. 6** Principle component analysis (PCA) of bacterioplankton community of all  
20 samples collected at different time points.

21

22

23

24

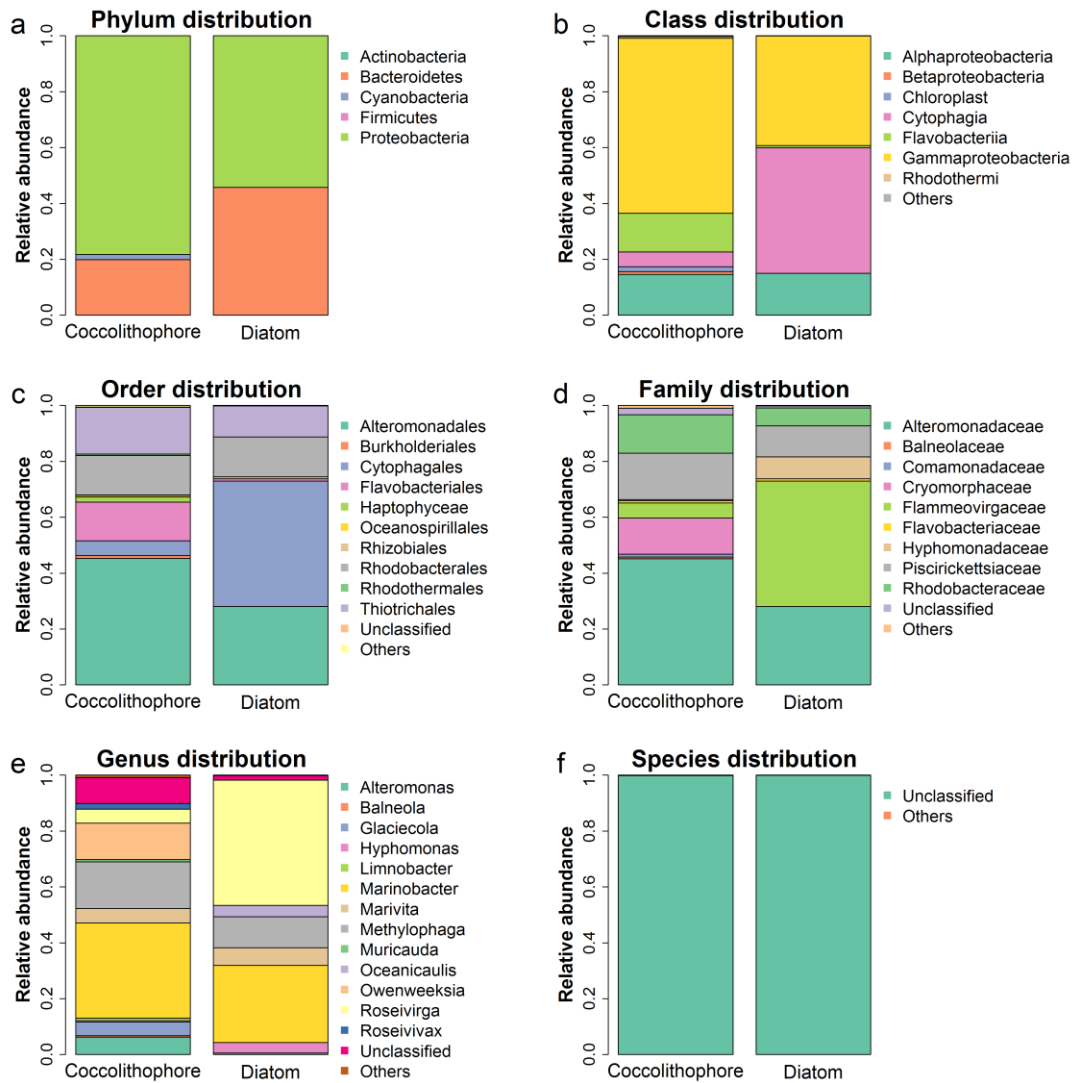

Supplementary Figure. 1

25  
26  
27  
28  
29  
30  
31  
32  
33  
34  
35

# Phylogenetic Tree

- ALPHAPROTEOBACTERIA
- FLAVOBACTERIIA
- GAMMAPROTEOBACTERIA

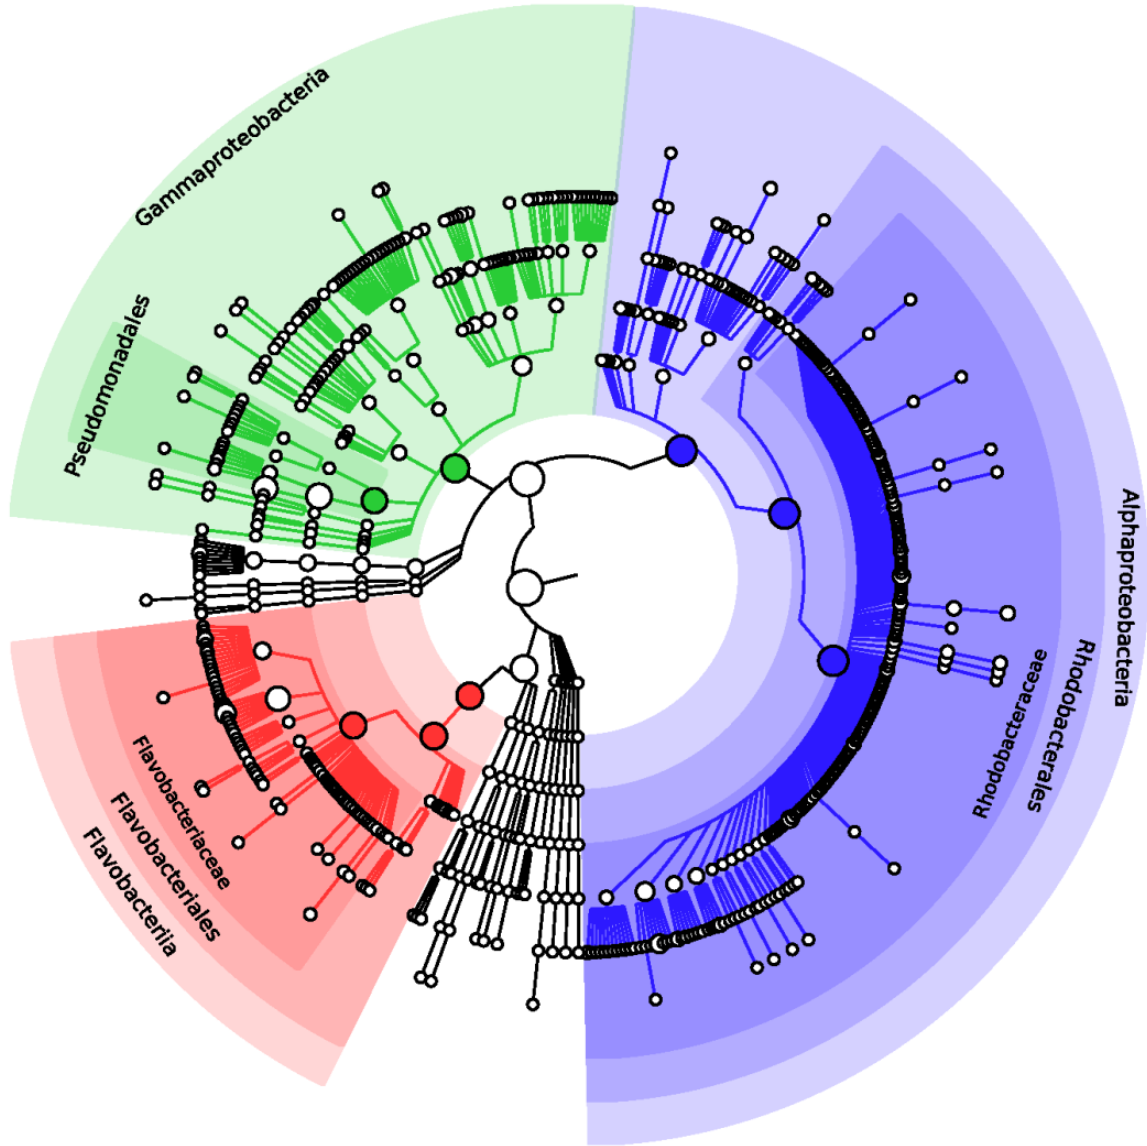

Supplementary Figure. 2

36  
37  
38  
39  
40  
41  
42  
43  
44  
45  
46  
47

**a** Composition of the top 10 taxa at the order

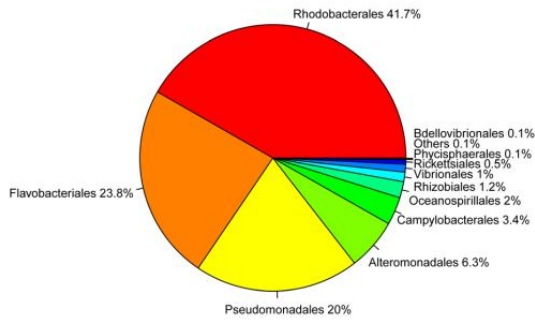

**b** Composition of the top 10 taxa at the class

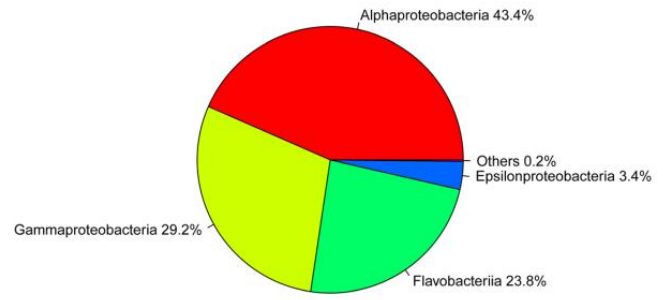

**c** Composition of the top 10 taxa at the family

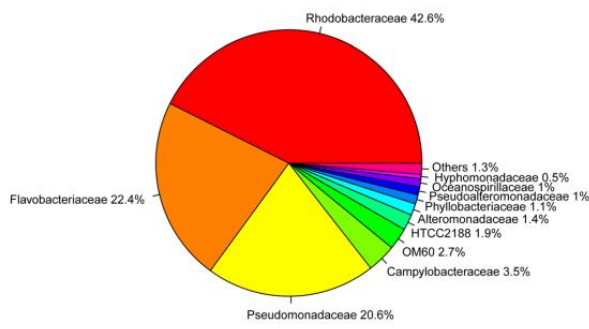

**d** Composition of the top 10 taxa at the genus

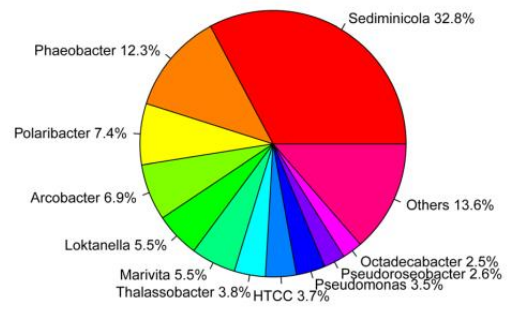

48  
49  
50  
51  
52

**Supplementary Figure. 3**

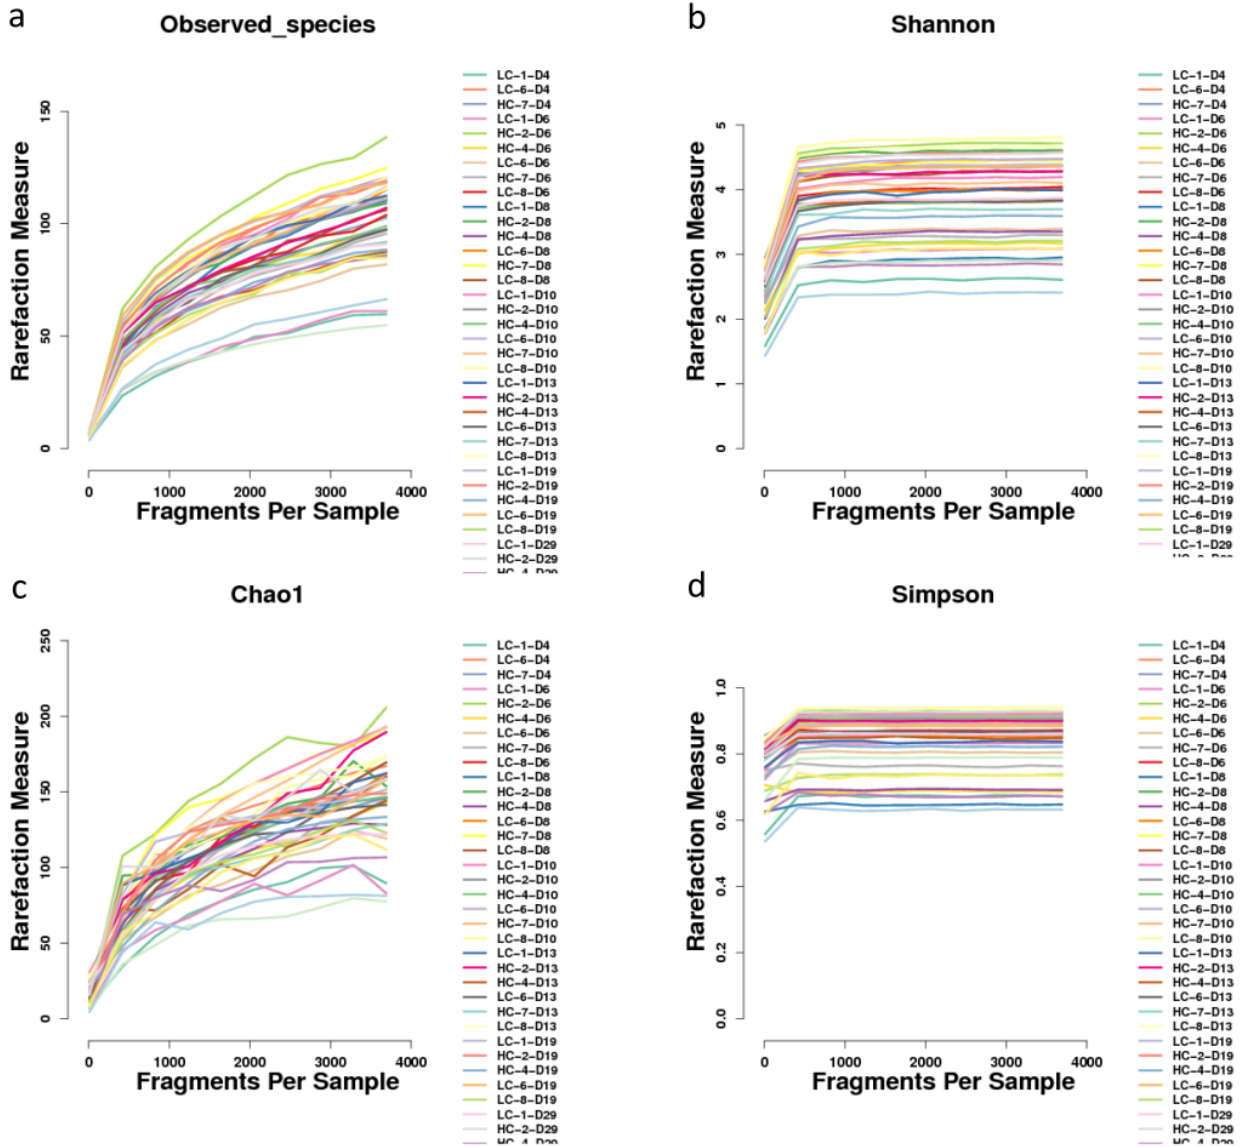

53

54

Supplementary Figure. 4

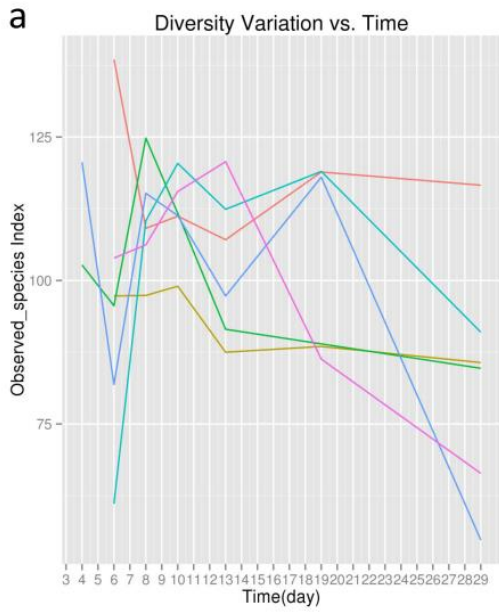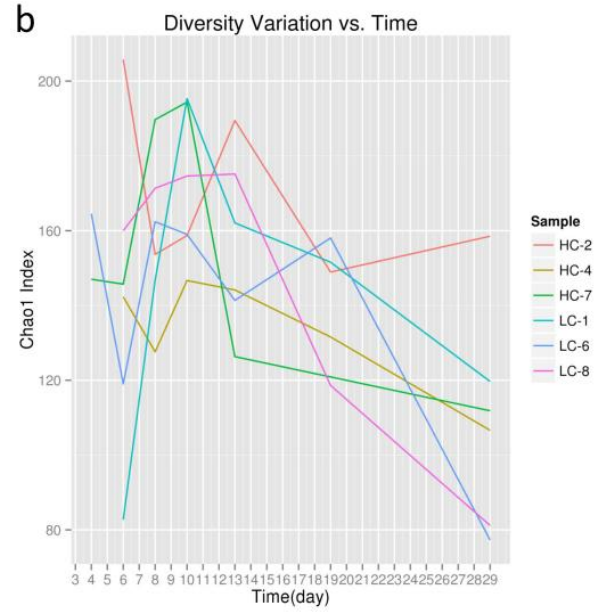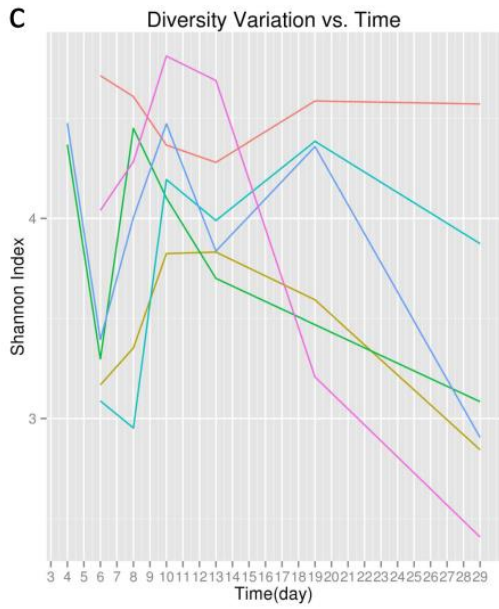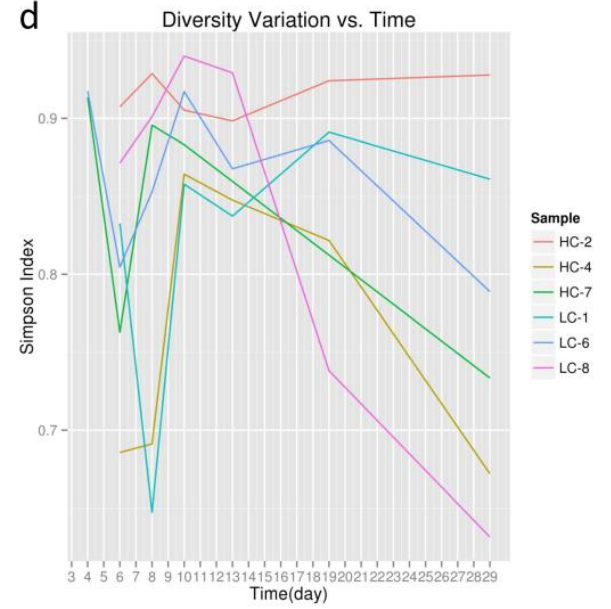

55

56

**Supplementary Figure. 5**

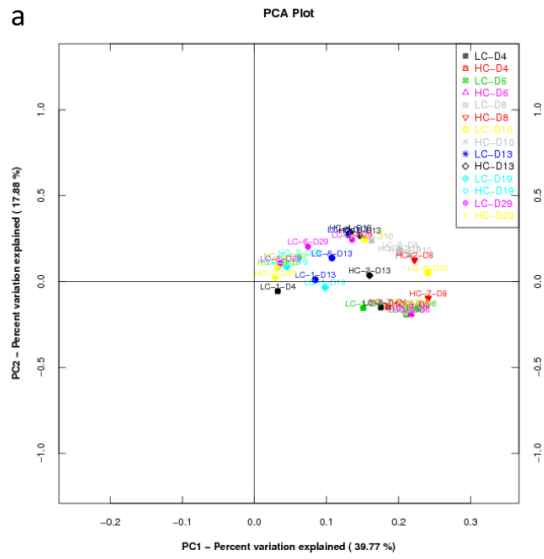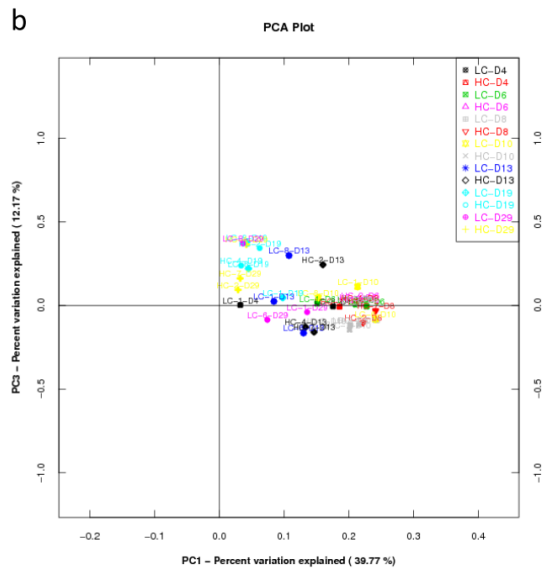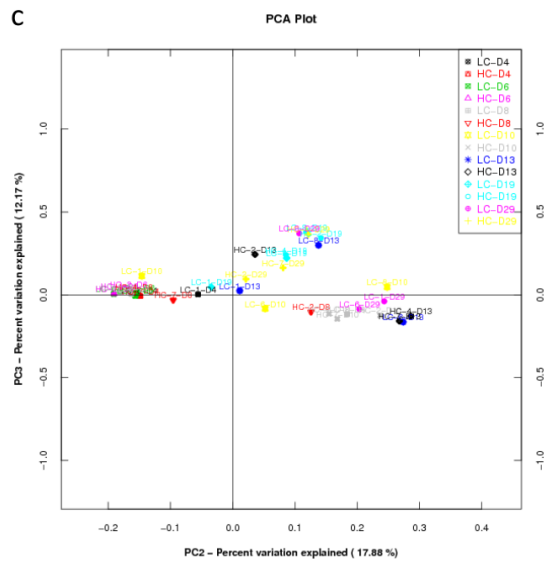

57  
58

Supplementary Figure. 6
